# Supplementary material
Source: PubMed Central journal article supplement (PMC4829447)
Supplement: NIHMS771329-supplement-supplement_1.pdf [file NIHMS771329-supplement-supplement_1.pdf]

## **Inventory of Supplemental Information**

Figure S1, related to Figure 1. Vascular phenotype of primary human medulloblastoma subtypes..

Figure S2, related to Figure 2. Vascular phenotype of xenografts of human WNT- and SHH- medulloblastoma

Figure S3, related to Figure 7. Vessel tortuosity and density in mWnt<sup>Wnt7a</sup> tumours.

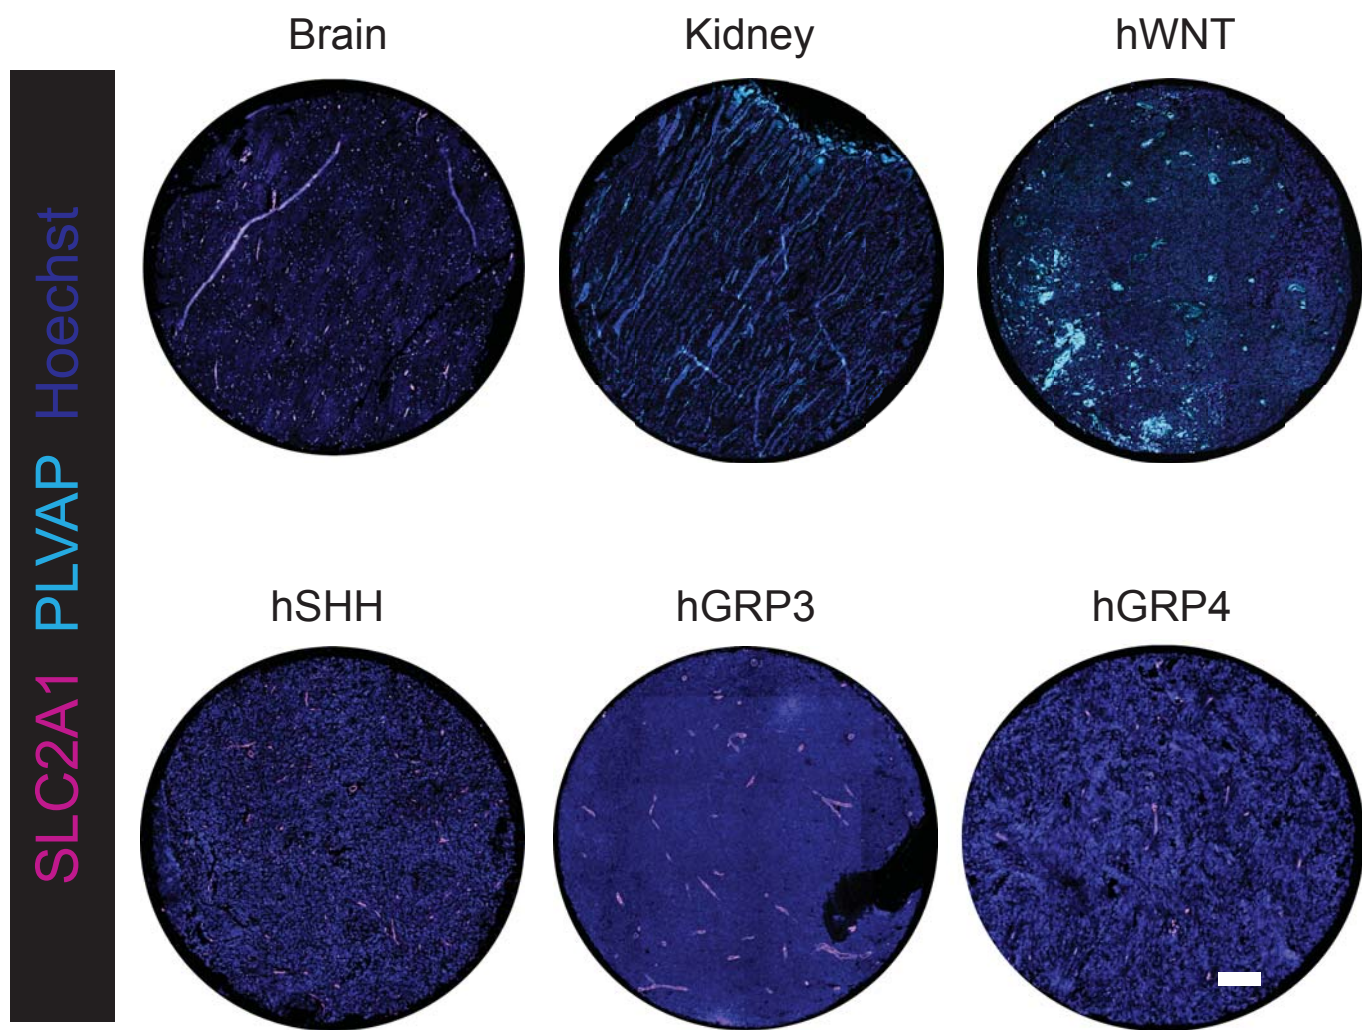

**Figure S1. Low power views of SLCA21 and PLVAP co-expression in human tissue cores of human brain, kidney and the four subtypes of medulloblastoma.**

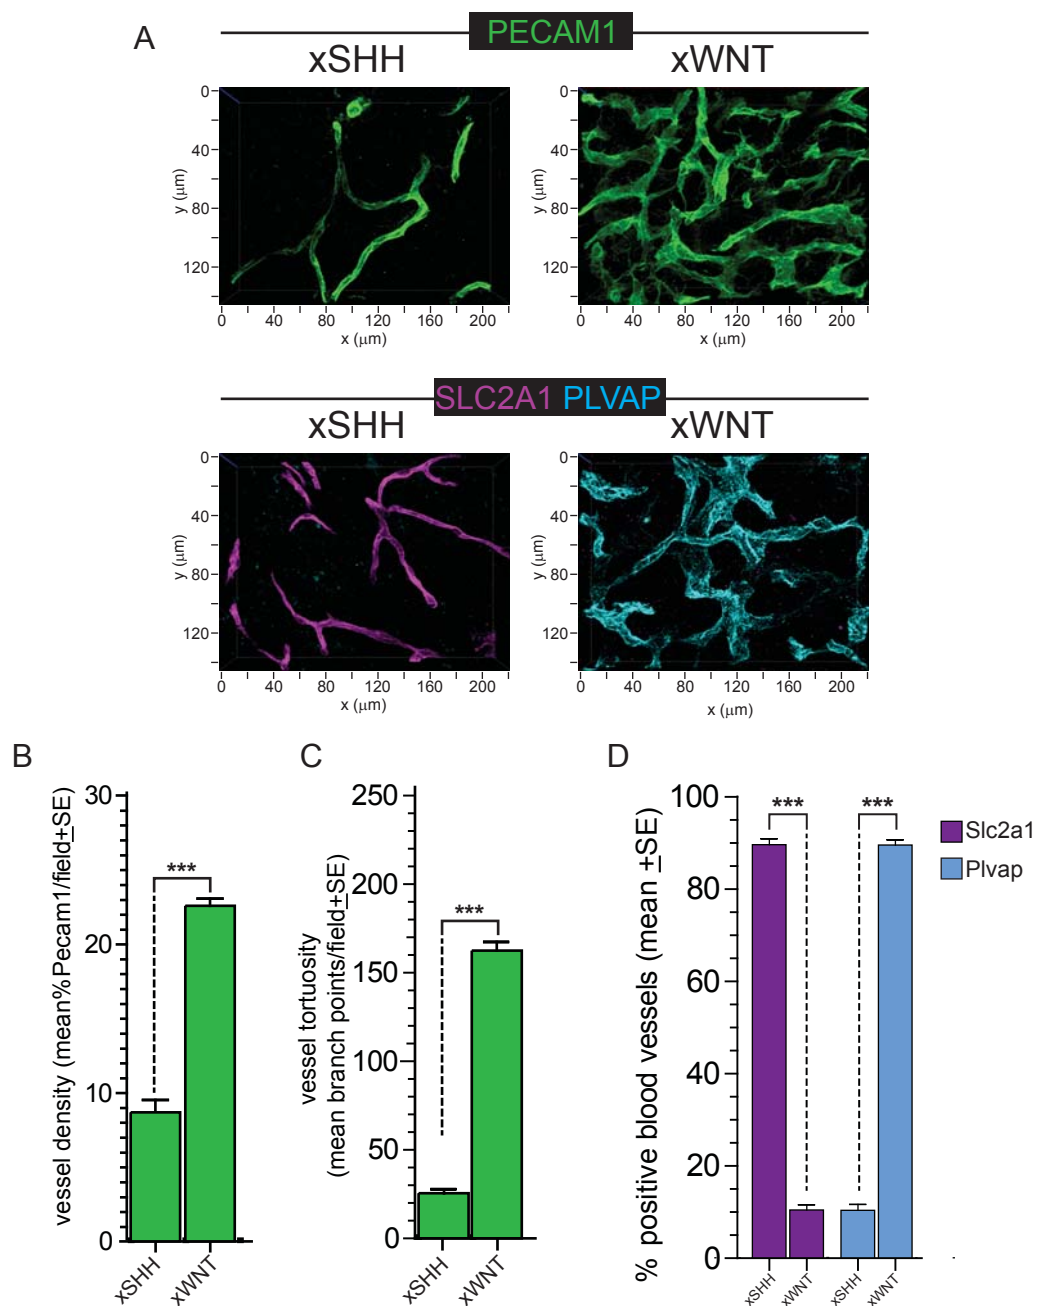

**Figure S2. BBB immunophenotype in xenografts of human medulloblastoma.** A. Confocal immunofluorescence of Pecam1 (top) and co-immunofluorescence of Slc2a1 and Plvap (bottom) in xWNT-, xSHH-medulloblastomas. Quantification of tumour vessel density (B), tortuosity (C), and Slc2a1/Plvap expression (D). \*\*\*= $P < 0.0005$ , Mann-Whitney.

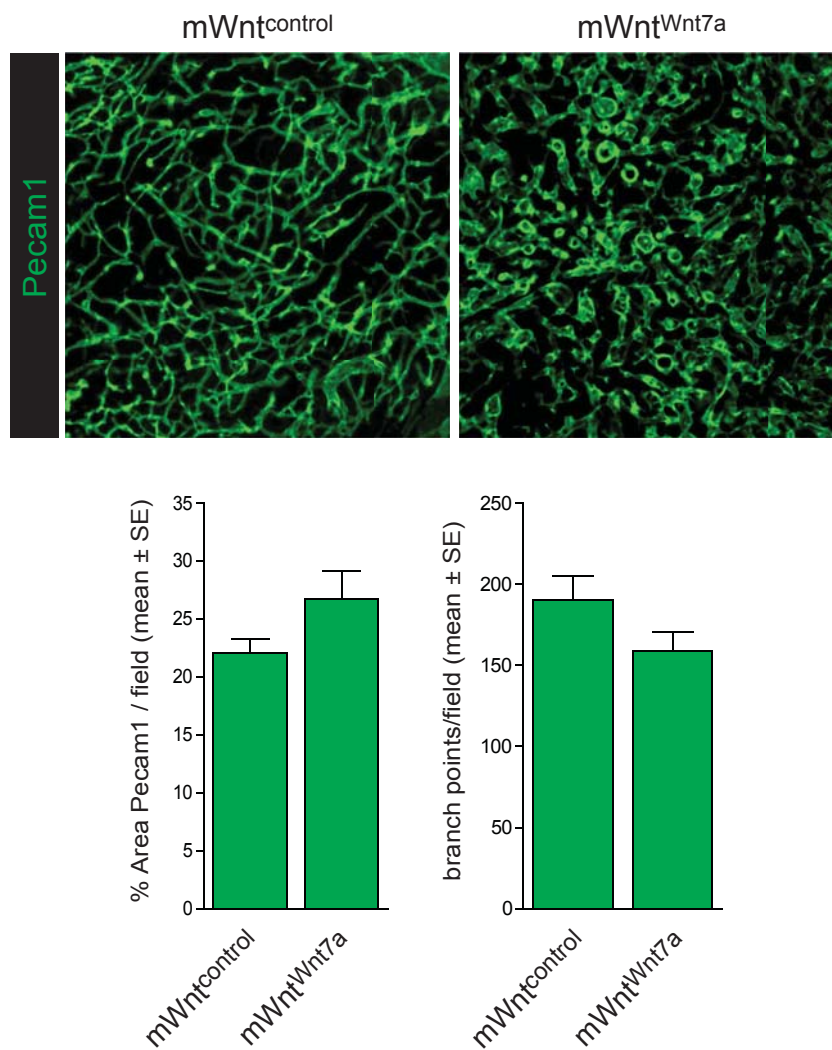

**Figure S3. Vessel density and tortuosity are unaffected by reversion of the BBB.** Top. Confocal immunofluorescence of Pecam1 expression in mWnt<sup>control</sup> and mWnt<sup>Wnt7a</sup> tumours. Bottom. Quantification of tumour vessel density (left) and tortuosity (right).
